# Supplementary material for: Solvothermal synthesis and electrochemical charge storage assessment of Mn3N2
Source: Royal Society of Chemistry journal article supplement (doi:10.1039/c4ta05316h), 2014-12-15

## Supplementary information – Solvothermal synthesis and electrochemical charge storage assessment of $\text{Mn}_3\text{N}_2$

S. I. U. Shah, A. L. Hector, X. Li and J. R. Owen

Chemistry, University of Southampton, Highfield, Southampton SO17 1BJ, UK

**Fits to powder diffraction data for  $\text{Mn}_3\text{N}_2$  samples produced at the temperatures shown:**

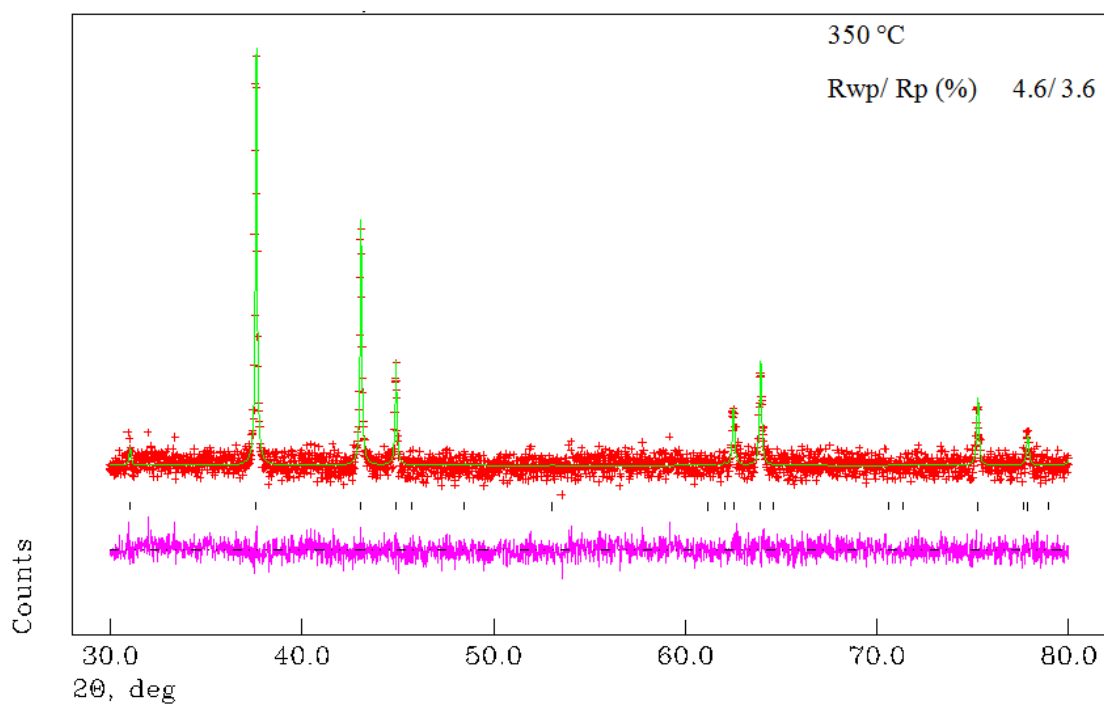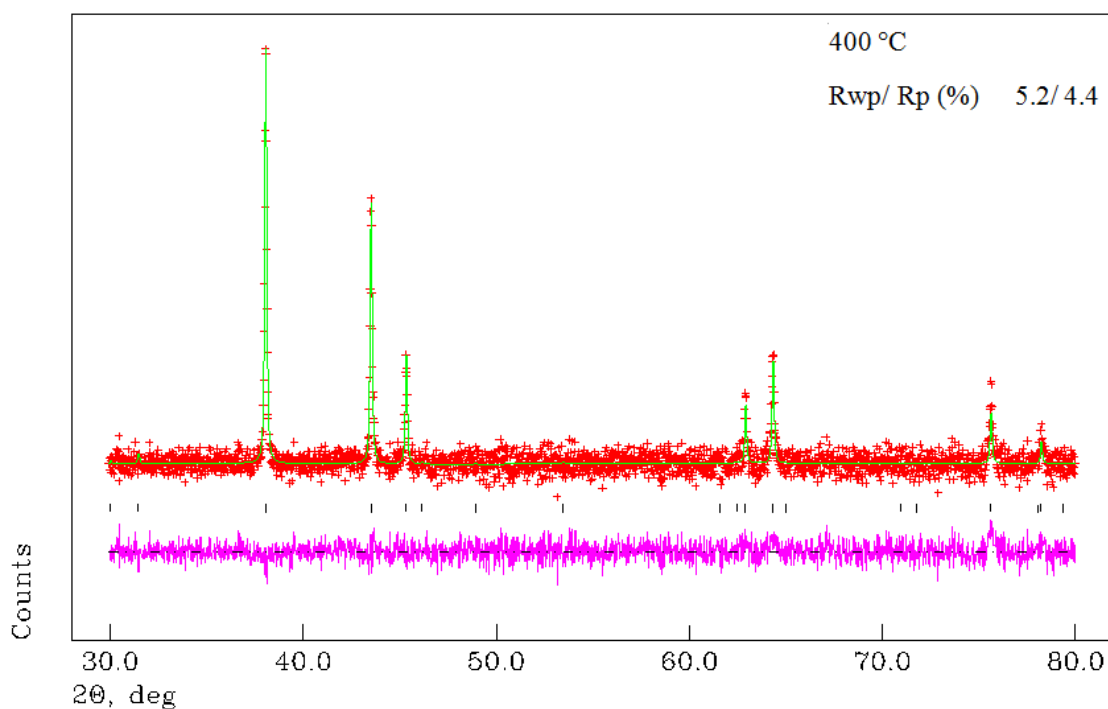

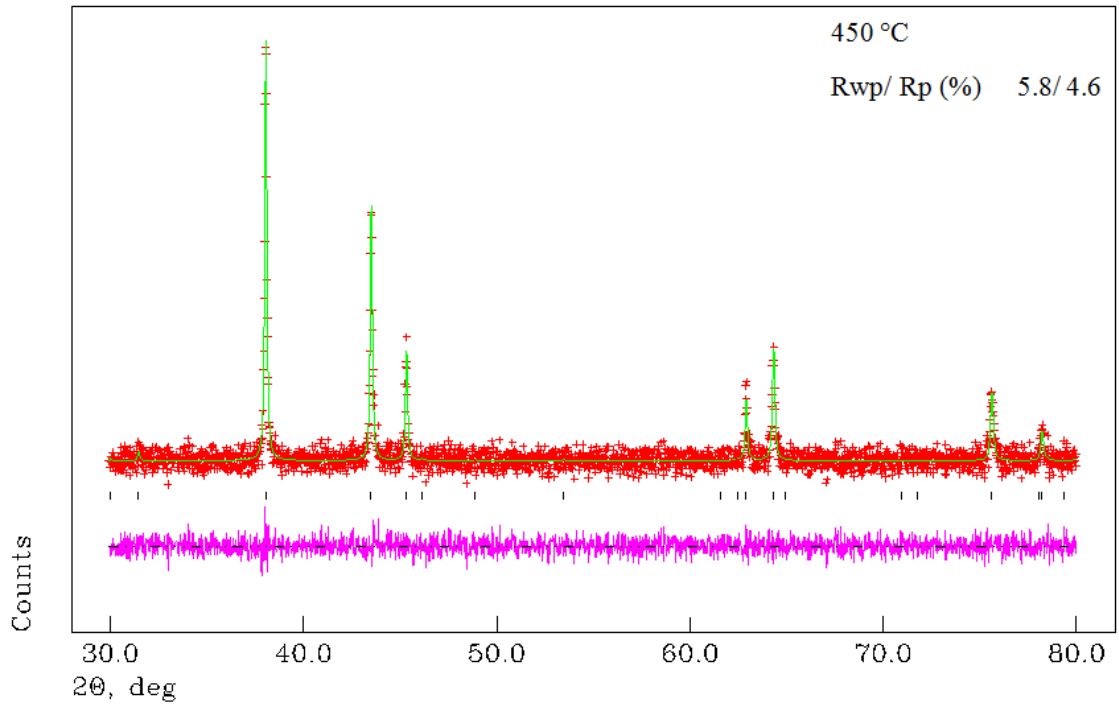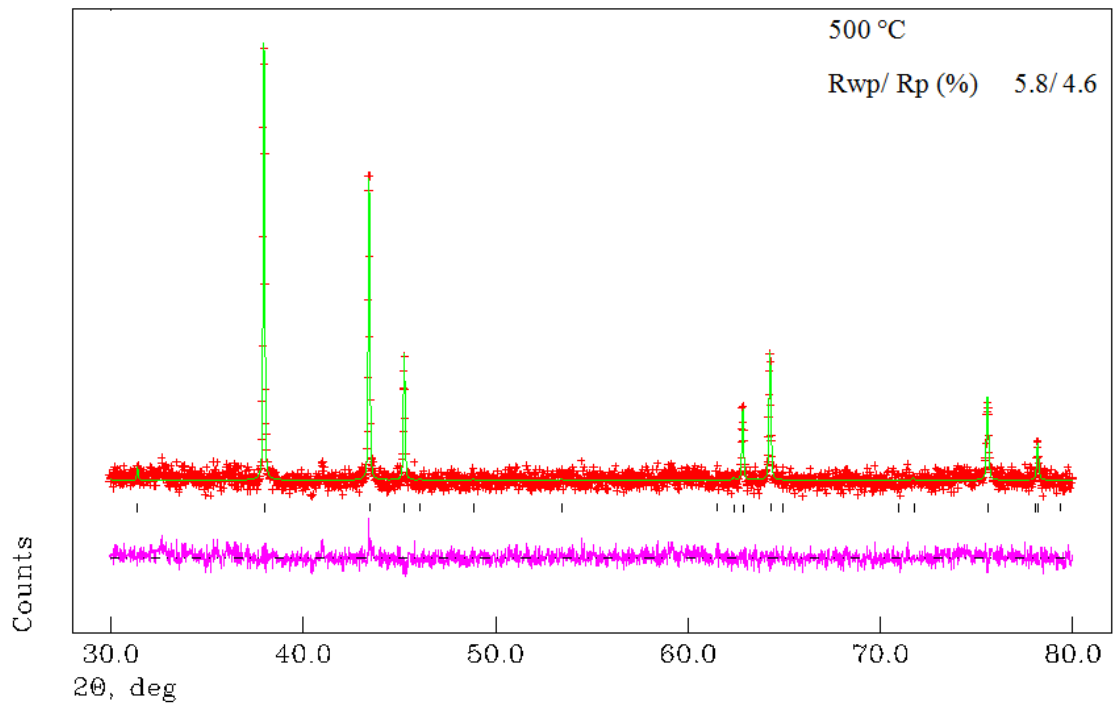

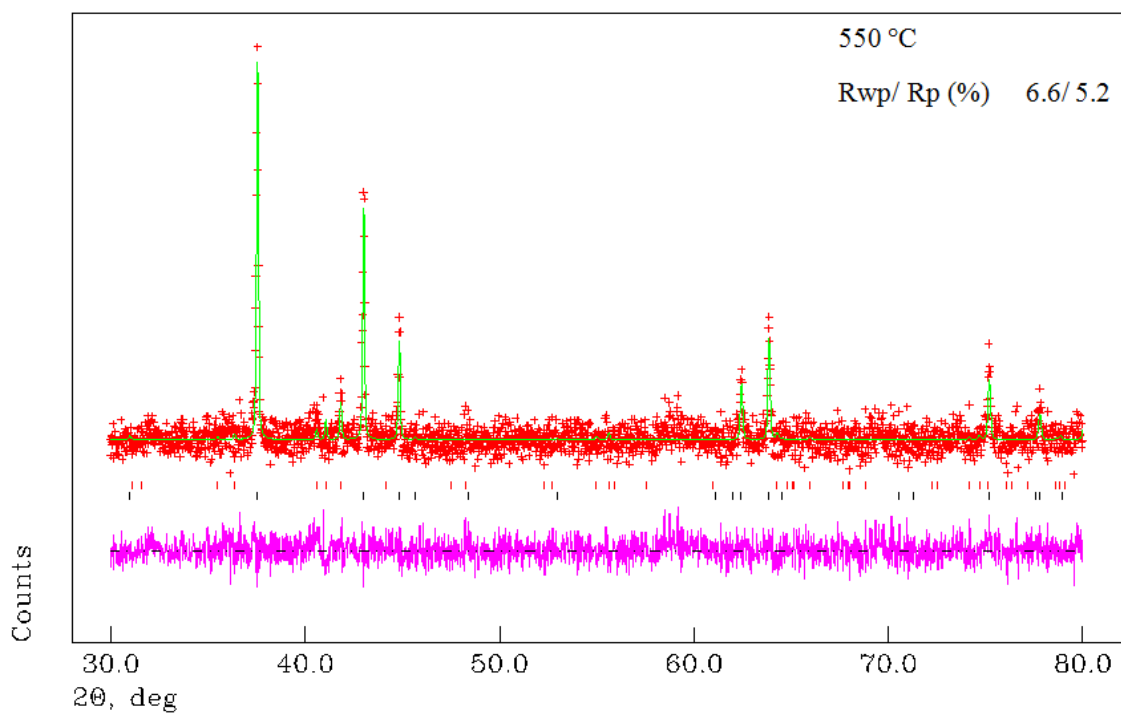

**Nitrogen adsorption/desorption data for  $Mn_3N_2$  samples produced at the temperatures shown:**

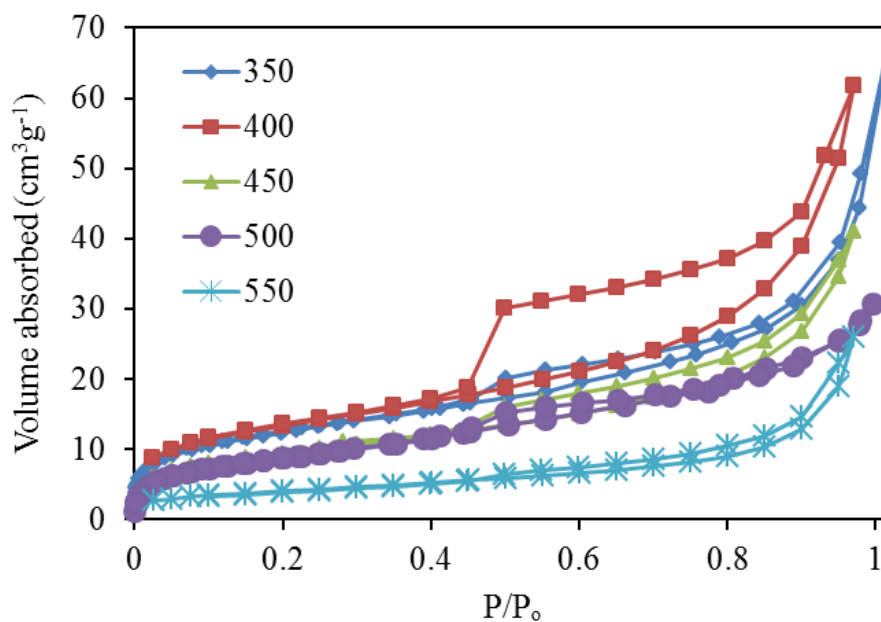

Supplement: c4ta05316h1.pdf [file c4ta05316h1.pdf]
